# Supplementary material
Source: PubMed Central journal article supplement (PMC7733532)
Supplement: supplementary_data_ddaa197.pdf [file supplementary_data_ddaa197.pdf]

## Legends for Supplementary Figures

### Supplementary Figure 1. Generation of *Anks6*<sup>tm1a/tm1a</sup> mice.

(a) Schematic demonstrating the *Anks6*<sup>tm1a</sup> allele used in this work. Binding positions of the genotyping primers are indicated with arrows. FRT, flippase recognition target; En2SA, *Engrailed2*, splice acceptor; IRES, internal ribosomal entry site; lacZ, *beta-galactosidase* gene; loxP, loxP sequence; neo, neomycin resistance gene.

(b) Genotyping details. Primer positions are shown in (a).

(c) Genotyping PCR products from tail tips. Primers 636 and 637 generate a 480 bp product from wild type allele, primers 606 and 637 generate 278 bp product from the mutant allele. H<sub>2</sub>O, water control.

(d) Western blot analysis on *Anks6*<sup>+/+</sup>, *Anks6*<sup>+/tm1d</sup> and *Anks6*<sup>tm1d/tm1d</sup> embryo lysates confirms the absence of Anks6 protein from *Anks6*<sup>tm1d/tm1d</sup> animals. No spurious truncated or full-length forms of Anks6 protein are produced by the *Anks6*<sup>tm1d</sup> allele.  $\beta$ -actin was used as a loading control.

(e) The expression of *gamma-aminobutyric acid type b receptor subunit 2 (Gabbr2)* gene is unchanged in wild type and *Anks6* mutant E18.5 livers. All experiments are n=5. Two-tailed unpaired t-test was used for statistical analysis. Data are mean and SEM. ns p=0.79. Mean of wild type - 0.88 vs. mean of *Anks6* mutant - 0.93.

(f) The expression of *polypeptide n-acetylgalactosaminyltransferase 12 (Galnt12)* gene is unchanged in wild type and *Anks6* mutant E18.5 livers. All experiments are n=5. Two-tailed unpaired t-test was used for statistical analysis. Data are mean and SEM. ns p=0.93. Mean of wild type - 0.86 vs. mean of *Anks6* mutant - 0.87.

### Supplementary Figure 2. Characterization of cardiac phenotypes in *Anks6*<sup>-/-</sup> mice.

(a,b) H&E staining of the coronal sections of the control mouse heart at P0, show normal structure of the heart (a). In contrast, muscular ventricular septal defect (VSD) is visible in the *Anks6* mutant heart (b, arrow). RV, right ventricle; LV, left ventricle.

(c) Coronal micro-MRI imaging reveals a spectrum of complex congenital heart malformations in *Anks6*

mutant embryos at E18.5. Embryo #3, has SS, with overriding aorta (red arrow); #7 has HTX, with AVSD (green arrow), overriding aorta (red arrow) and straight arch; #24 has HTX; #21 has SS, with VSD, bilateral ventricular hypertrophy and overriding aorta (red arrow). AVSD, atrioventricular septal defect, HTX, heterotaxia; SS, Situs solitus; VSD, ventricular septal defect.

**Supplementary Figure 3. HE staining of *Anks6*<sup>-/-</sup> liver reveals normal morphology and histology at E15.5.**

(a,b) The liver morphology appears largely unaffected in E15.5 *Anks6*<sup>-/-</sup> embryos. Note the comparable size of the liver lobes between the wild type (a) and *Anks6*<sup>-/-</sup> (b) littermates on a frontal section.

(c,d) Similarly, the histology of the hilar region appears comparable between wild type (c) and mutant (d) liver at E15.5. Asterisk marks the stomach, whose position is reversed in *Anks6*<sup>tm1d/tm1d</sup> mice. Li, liver; Ki, kidney; pv, portal vein. Scale bar, 50 μm.

**Supplementary Figure 4. αSMA expression is unchanged in *Anks6*<sup>-/-</sup> livers at E15.5.**

(a-b'') Staining of wild type (a-a'') and *Anks6* mutant (b-b'') livers with antibodies against αSMA (red) and Sox9 (green) did not reveal overt changes in the presence of αSMA<sup>+</sup> myofibroblasts in the mutant livers compared to wild type livers at E15.5. Sox9<sup>+</sup> bile duct progenitors were detected in the livers of both genotypes, although their numbers was reduced in the mutant portal area. pv, portal vein. Scale bar, 50 μm.

**Supplementary Figure 5. *Anks6* mutant mice present a spectrum of liver portal defects.**

(a) The portal mesenchyme is significantly reduced in *Anks6* mutant livers, compared to wild type livers, both at E18.5 and at birth (P0). Portal mesenchyme thickness measured as indicated by red brackets at **Figure 2a, d, j, g**.

(b-e) *Anks6*<sup>-/-</sup> bile ducts display degenerative histology in the liver periphery at P0. The portal vein is often completely obliterated and difficult to identify (a,b,c). Numerous collapsed bile duct rudiments surround

the portal vein. Near continuous, unremodelled ductal plate is visible in e. Asterisk marks the obliterated portal vein; dashed yellow lines mark the atrophic bile ducts; pv, portal vein. Scale bar, 50  $\mu$ m.

**Supplementary Figure 6. Wnt target gene expression is unchanged in *Anks6*-mutant livers at E18.5.**

(a) The expression of canonical Wnt targets is unchanged in *Anks6*<sup>-/-</sup> livers at E18.5. The expression of *Axin2* (ns, p=0.67), *cMyc* (ns, p=0.57) and *Ccnd1* (ns, p=0.14) was measured in wild type (n=5 or 6) and mutant (n=5) total liver lysates by qRT-PCR. Two-tailed unpaired t-test was used for statistical analysis. Data are mean and SEM.

(b) The expression of non-canonical Wnt targets is unchanged in *Anks6*<sup>-/-</sup> livers at E18.5. The expression of *Wnt5a* (ns, p=0.99) and *Dkk1* (ns, p=0.46) was measured in wild type (n=6) and mutant (n=5) total liver lysates by qRT-PCR. Two-tailed unpaired t-test was used for statistical analysis. Data are mean and SEM.

**a**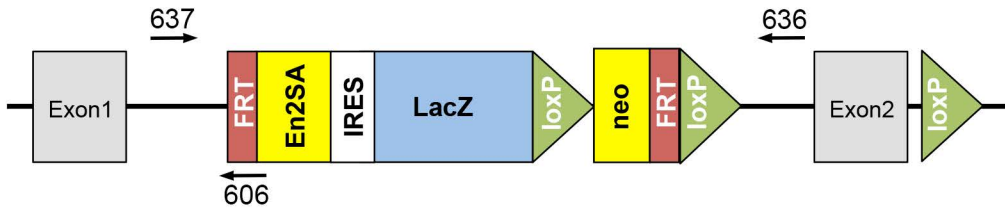**b**

606 GGAAGTTCGGAATAGGAACTTC  
 636 CCCATAGACATGCAAACATGC  
 637 GCAGAGTGGTATAGGCAGATGG

636/637: 480 bp, wild type allele  
 606/637: 278 bp, mutant allele

**c**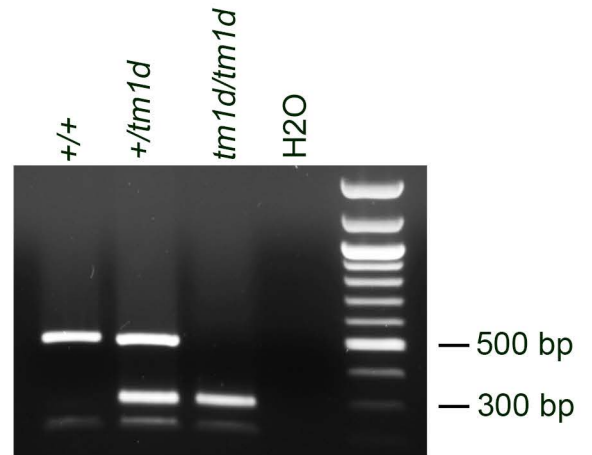**d**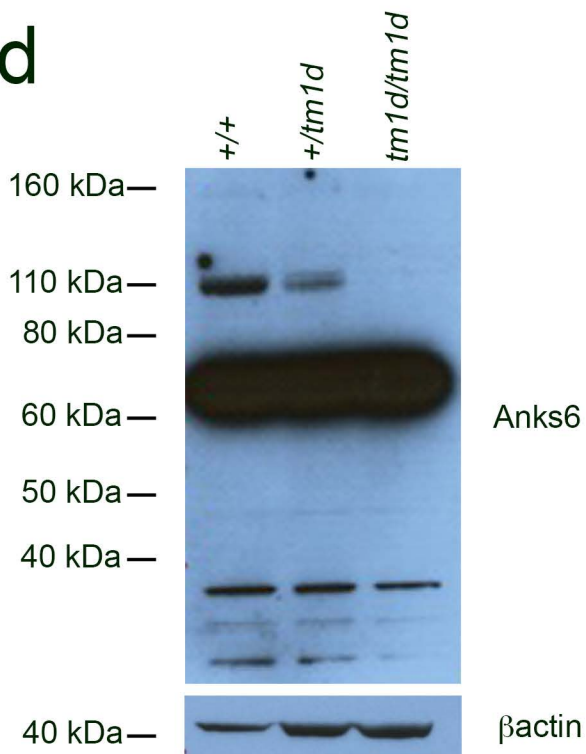**e**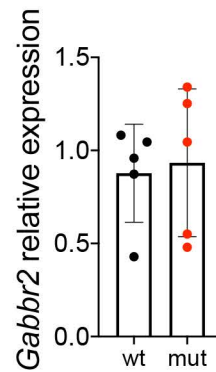**f**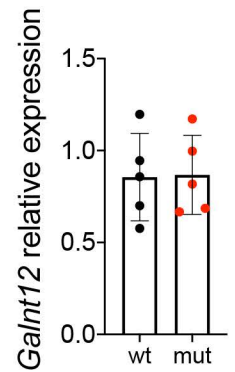

Supplementary Figure 1

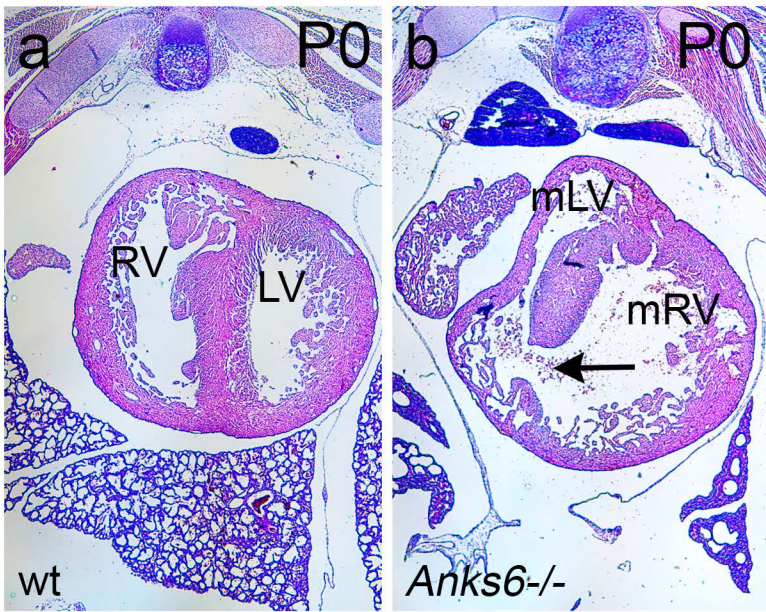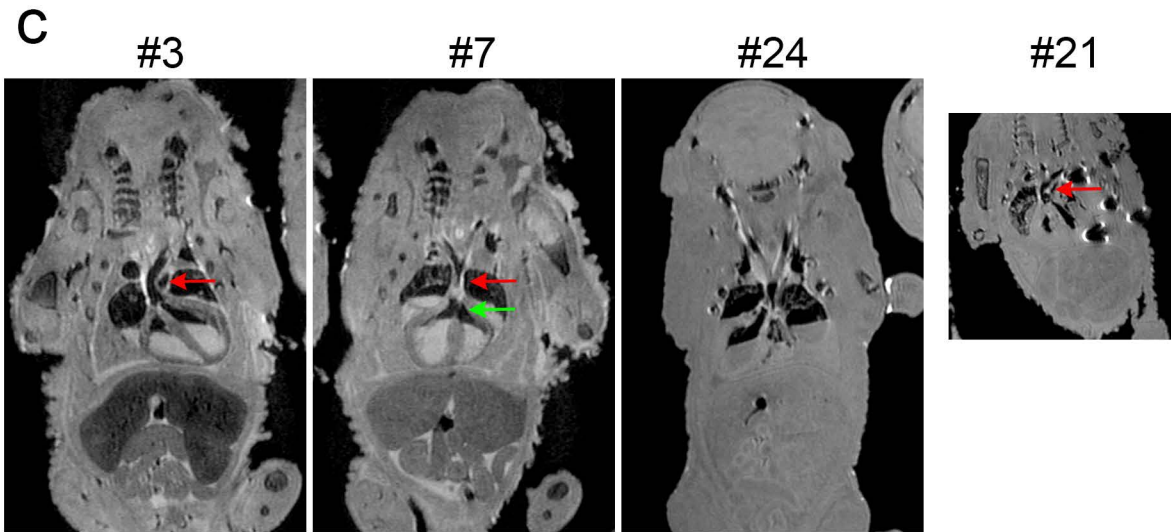

Supplementary Figure 2



*Anks6*<sup>+/+</sup>

*Anks6*<sup>tm1d/tm1d</sup>

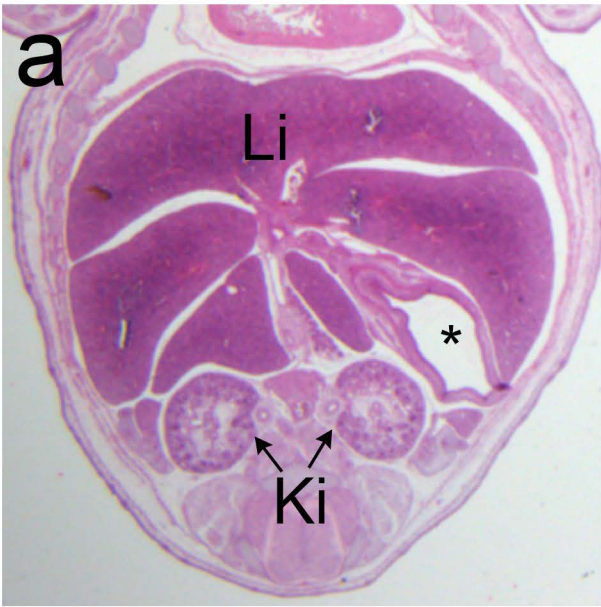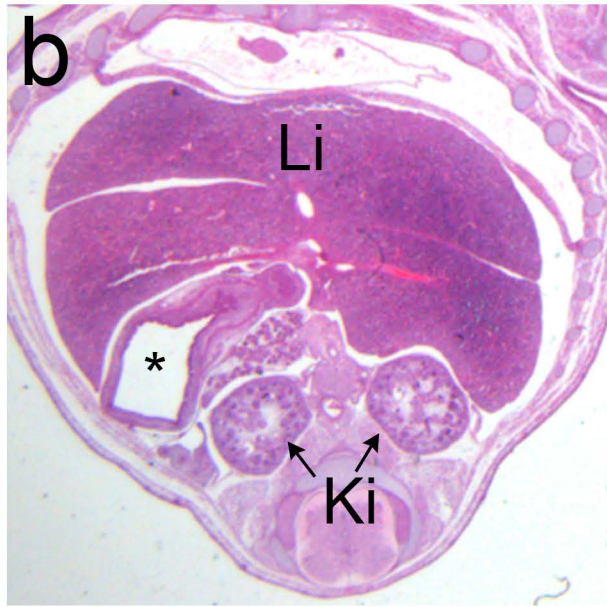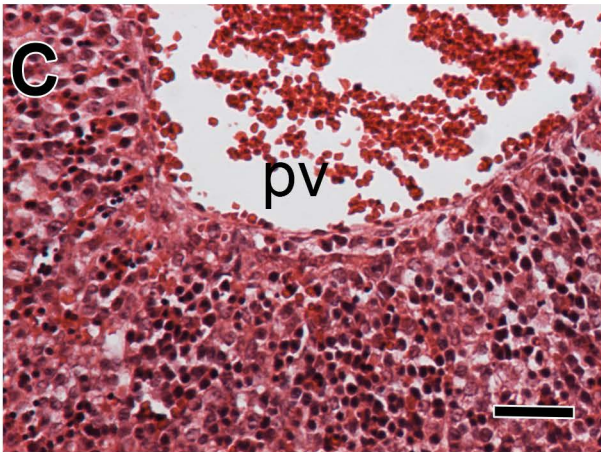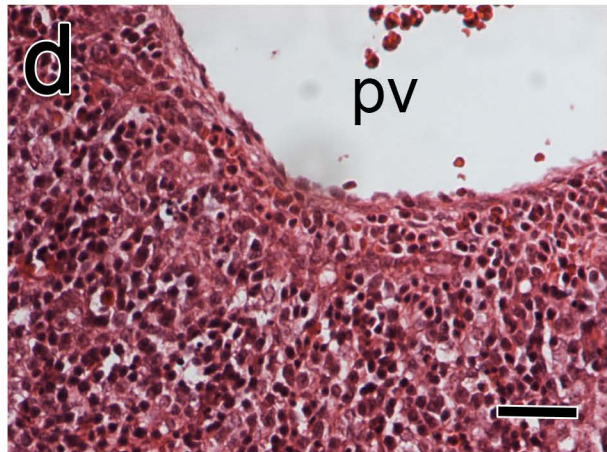

Supplementary Figure 3



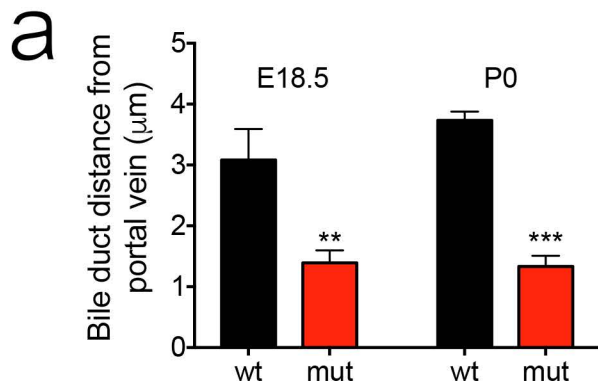

P0, *Anks6*<sup>tm1d/tm1d</sup> liver periphery

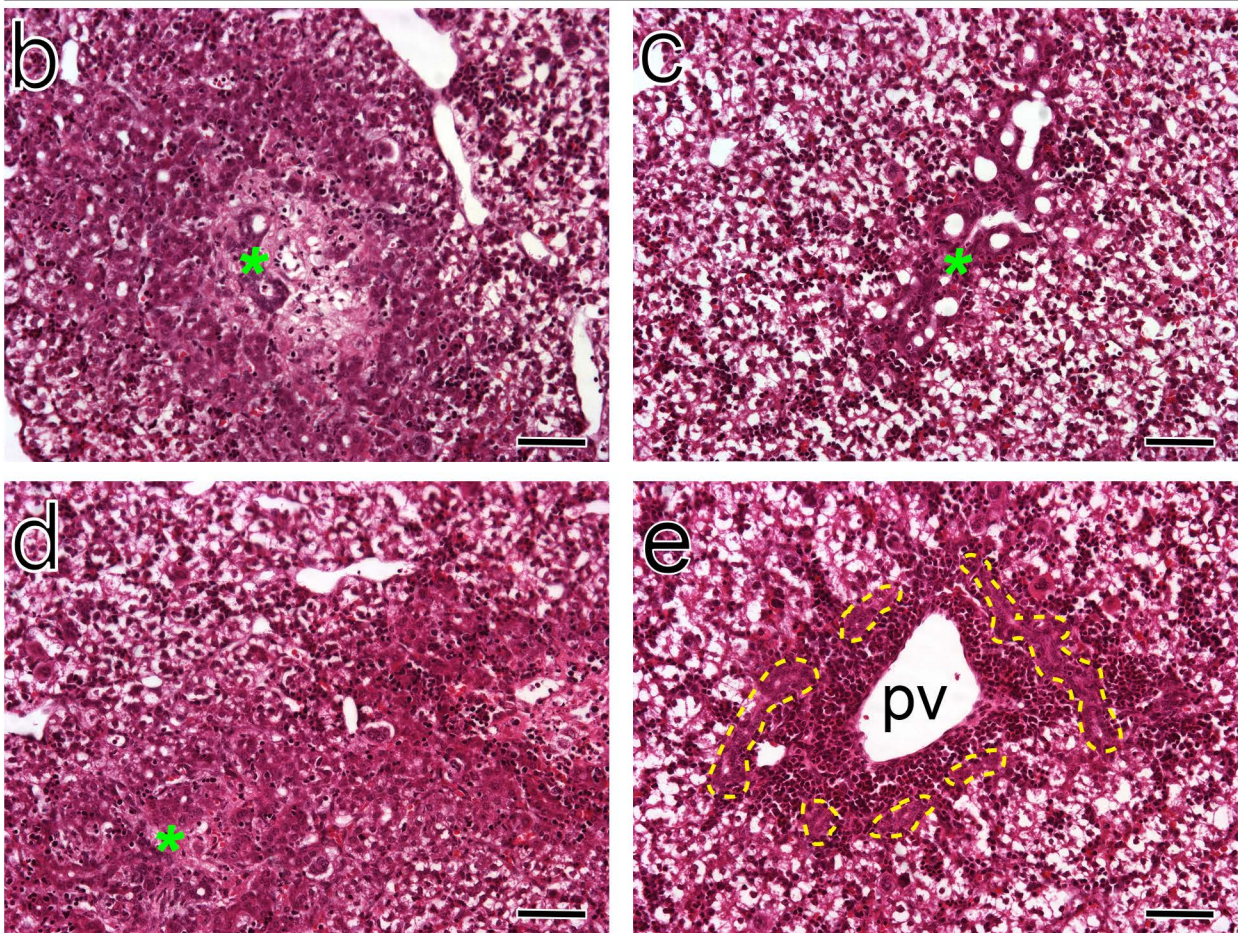

Supplementary Figure 4



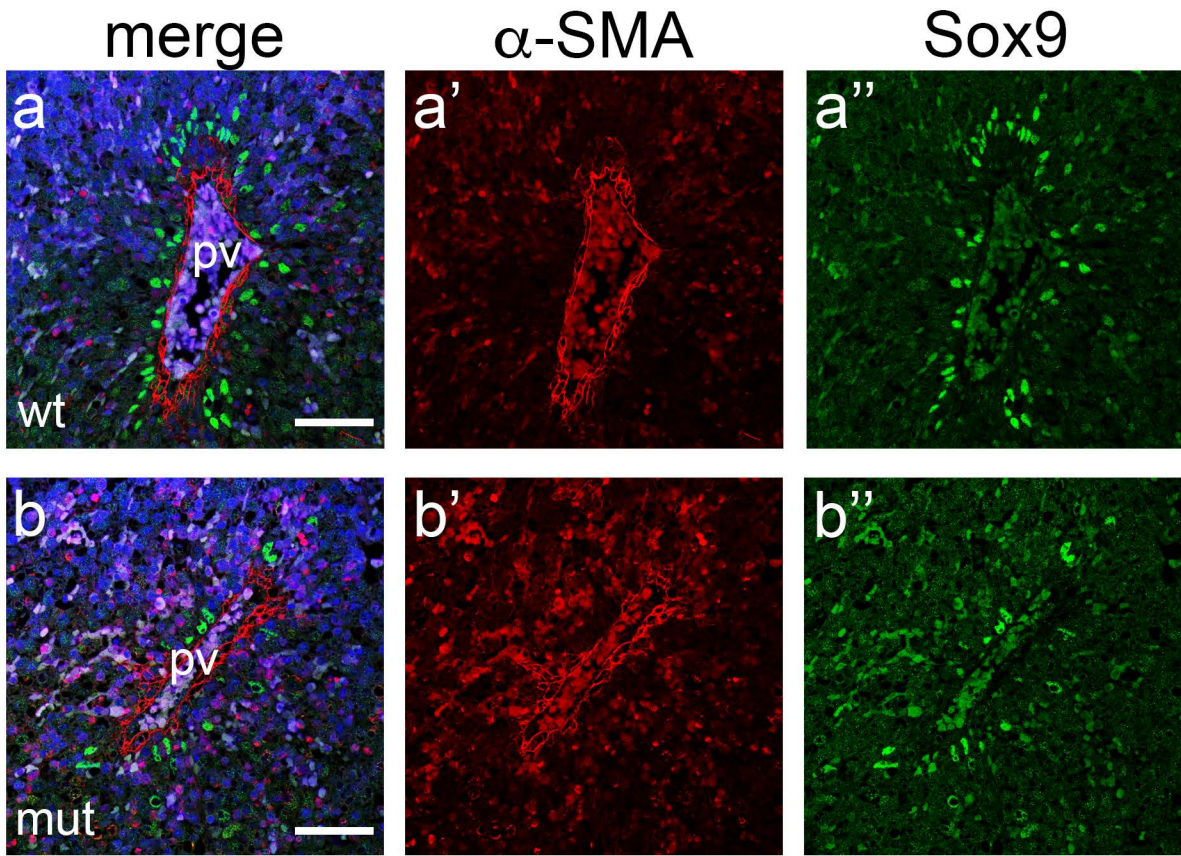

Supplementary Figure 5



**a** canonical Wnt target genes

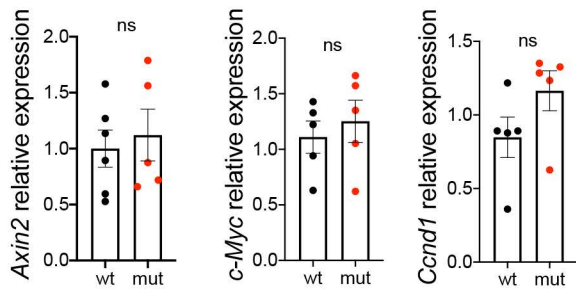

**b** non-canonical Wnt target genes

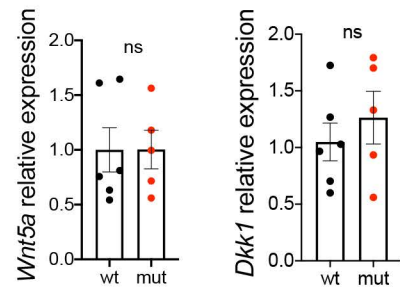

Supplementary Figure 6

**Supplementary Table 1. Antibodies and lectins used in the study.**

| <b>Antibody</b>                          | <b>Source</b>                | <b>Identifier</b> |
|------------------------------------------|------------------------------|-------------------|
| Mouse anti- $\beta$ -actin               | Abcam                        | ab49900           |
| Rabbit anti-Albumin                      | Novus Biologicals            | NB600-41532       |
| Mouse anti-ANKS6                         | Santa Cruz                   | sc-515124         |
| Rabbit anti-ANKS6                        | Sigma-Aldrich                | HPA008355-100UL   |
| Mouse anti- $\beta$ -Catenin             | BD Transduction Laboratories | 610154            |
| Rabbit anti-Cyr61                        | Abcam                        | ab24448           |
| Mouse E-cadherin                         | BD Transduction Laboratories | 610182            |
| Mouse anti-EpCAM (CD326)                 | BioLegend                    | 118205            |
| Mouse anti-FLAG                          | Proteintech                  | 66008-2-Ig        |
| Rabbit anti-FLAG                         | Proteintech                  | 20543-1-AP        |
| Mouse anti-Gapdh                         | Trevigen                     | 2275-PC-100       |
| Rabbit anti-HNF1b                        | Proteintech                  | 12533-1-AP        |
| Goat anti-INVS                           | Santa Cruz                   | sc-8719           |
| Mouse anti-Osteopontin                   | R&D Systems                  | AF808             |
| Mouse anti-pan-cytokeratin               | Sigma-Aldrich                | c2562             |
| Mouse anti- $\alpha$ SMA                 | Sigma-Aldrich                | A5228             |
| Mouse anti- $\alpha$ SMA-Cy3             | Sigma-Aldrich                | C6198             |
| Rabbit anti-Sox9                         | Millipore                    | AB5535            |
| Rabbit anti-acetylated $\alpha$ -tubulin | Cell Signaling               | #5335             |
| Mouse anti-gamma-tubulin                 | Abcam                        |                   |
| Mouse anti-polyglutamylated tubulin      | Adipogen                     | GT335             |
| Rabbit anti-V5                           | Cell Signaling               | #13202            |
| Mouse anti-YAP                           | Santa Cruz                   | sc-101199         |
| DBA lectin                               | VectorLaboratories           | B-1035            |

**Supplementary Table 2. qRT-PCR primers used in this study.**

| Gene                          | Species | Forward                                                    | Reverse                     |
|-------------------------------|---------|------------------------------------------------------------|-----------------------------|
| Anks6                         | mouse   | CAACAGCCGCAACCACTAC                                        | GCCTCTAGCAGCAGCTTAC         |
| Gapdh                         | mouse   | GACTTCAACAGCAACTCCCA                                       | TGTAGCCGTATTCATTGTCATACC    |
| Yap                           | mouse   | TACTGATGCAGGTACTGCGG                                       | TCAGGGATCTCAAAGGAGGAC       |
| Ctgf                          | mouse   | ATGATGCGAGCCAACCTGCCTG                                     | CGGATGCACTTTTTGCCCTTCTTAATG |
| Cyr61                         | mouse   | GTGCCGCCTGGTGAAAGAGA                                       | GCTGCATTCTTGCCCTTTTTTAG     |
| Sox9                          | mouse   | ACTCTGGGCAAGCTCTGGAG                                       | CGAAGGGTCTCTTCTCGCTCT       |
| Albumin                       | mouse   | GCTGAGACCTTCACCTTCCA                                       | TCTTCAGTTGCTCCGCTGTA        |
| Cytokeratin19                 | mouse   | CCCACGTGTTCCACAAACATC                                      | CCATGGGAACAGTTATTTGGAGA     |
| Fabp2                         | mouse   | GTGGAAAGTAGACCGGAACGA                                      | CCATCCTGTGTGATTGTCAGTT      |
| Axin2                         | mouse   | ACAGCATCTTCACTT                                            | AGAAACCCTCACTTCCTAAA        |
| Ccnd1                         | mouse   | CCCAACAACCTCCTCTCCTG                                       | TCCAGAAGGGCTTCAATCTG        |
| cMyc                          | mouse   | CAACGACAGCAGCTCGCCCA                                       | CCGTGGGGAGGACTCGGAGG        |
| Wnt5a                         | mouse   | ACACAACAATGAAGCAGGCCGTAG                                   | GGAGTTGAAGCGGCTGTTGACC      |
| Dkk1                          | mouse   | CGCTGCATGAGGCACGCTAT                                       | GGCGGC GTTGTGGTCATTAC       |
| Gabbr2                        | mouse   | AAGACCCCATAGAGGACATCAA                                     | GGGTGGTACGTGTCTGTGG         |
| Galnt12                       | mouse   | TCAACATCTATCTGAGCGACCG                                     | CTTGGGCAGGTTATCATAATCGT     |
| <b>shRNA target sequences</b> |         |                                                            |                             |
| Anks6                         | mouse   | CCGGAGCTCGATGTTCTCCCTAATGCTCGAGCATTAGGGAGAACATCGAGCTTTTTTG |                             |
| <b>sgRNA target sequences</b> |         |                                                            |                             |
| Anks6 1-18 (exon1)            | mouse   | GCGGTCGAGAGCAACCTCGAAGG                                    |                             |
| Anks6 2-15 (exon2)            | mouse   | CCTGTACTTGCGGTCGAGAGCAA                                    |                             |
